# Supplementary material
Source: MDPI journal article supplement (https://www.mdpi.com/1424-2818/14/8/686)
Supplement: s1 [file s1]

[illegible]

**Figure S1.** The full nomogram of data for the application of medicinal plants classified by the degree of their usability, namely for treating human health conditions.

[illegible]
